# Supplementary material
Source: PubMed Central journal article supplement (PMC4876625)
Supplement: thnov06p1012s1.pdf [file thnov06p1012s1.pdf]

# A Facile Approach to Functionalize Cell Membrane-Coated Nanoparticles

Hao Zhou<sup>1</sup>, Zhiyuan Fan<sup>1</sup>, Pelin K. Lemons<sup>1</sup> & Hao Cheng<sup>1,2,\*</sup>

## Supplementary data

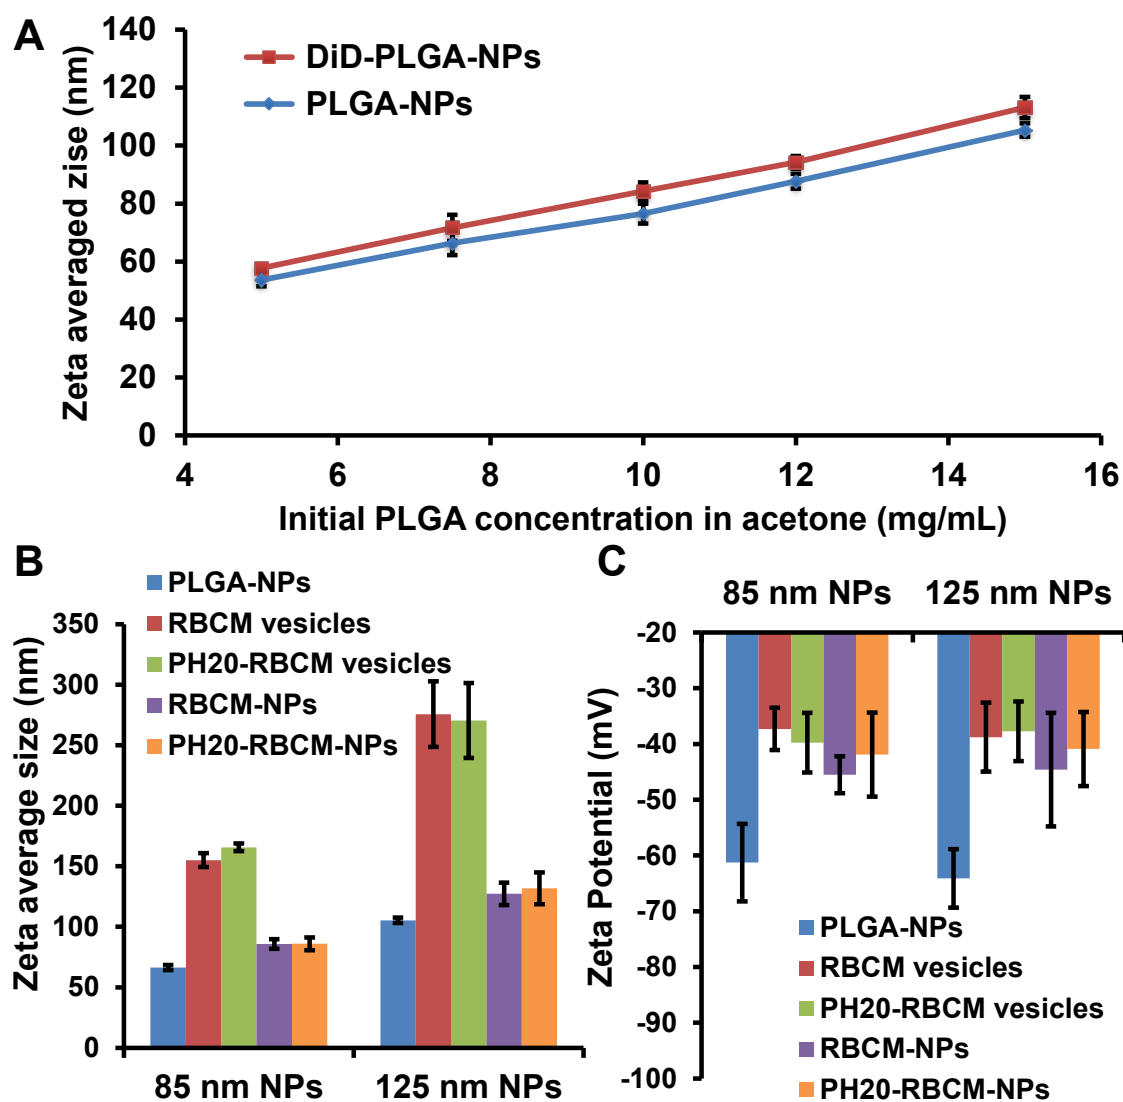

Figure S1. Characterization of NPs. A) Zeta-averaged sizes of PLGA-NPs and DiD-labeled PLGA-NPs prepared using PLGA acetone solutions at various concentrations. (5, 7.5, 10, 12, 15 mg/mL) Values are mean  $\pm$  s.d., n=3. B) Zeta-averaged sizes of PLGA-NPs, RBCM-NPs and PH20-RBCM-NPs. Vesicles are membrane-formed particles without PLGA-NP core. Values are mean  $\pm$  s.d., n=3. C) Zeta potential of PLGA-NPs, RBCM-NPs and PH20-RBCM-NPs. Values are mean  $\pm$  s.d., n=3.

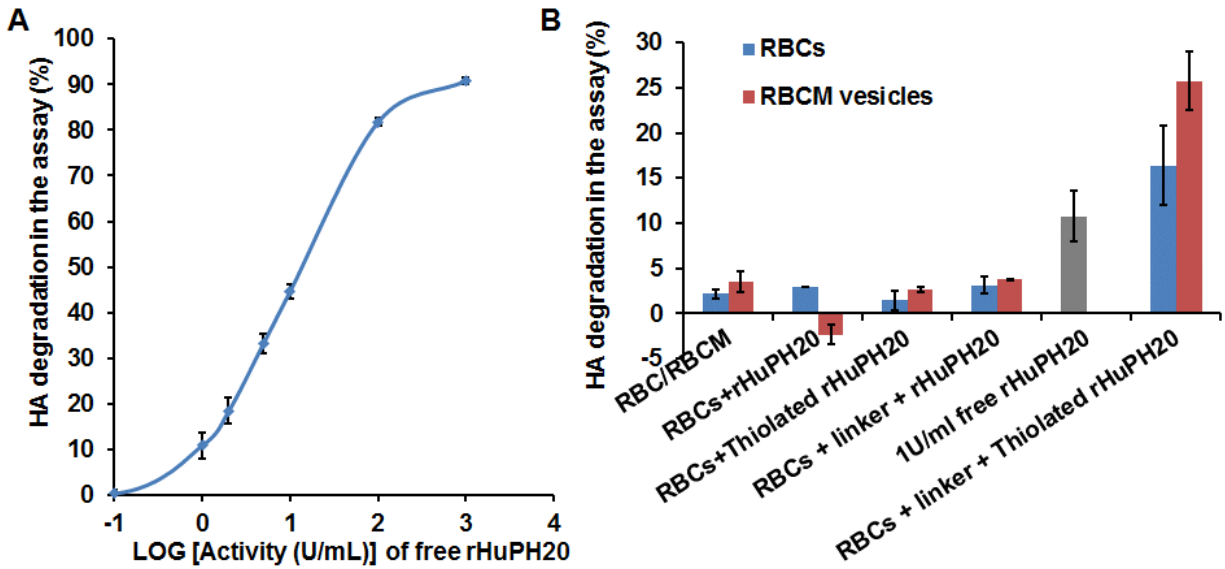

Figure S2. rHuPH20 activity assay demonstrating the covalent conjugation of rHuPH20 on the RBC membranes. (A) Standard curve of free rHuPH20 activity ranging from 0.1 U/mL to 1000 U/mL. Values are mean  $\pm$  s.d., n=3. (B) rHuPH20 activity of RBCs or RBC membrane vesicles that are modified or prepared under conditions with or without linker and/or rHuPH20 thiolation. Free rHuPH20 served as a positive control. Vesicles refer to RBC membrane-formed particles without PLGA-NP core. The RBC membranes were isolated to form small vesicles (RBCM vesicles) in order to increase the access of conjugated rHuPH20 to HA matrix in the assay. Values are mean  $\pm$  s.d., n=3.

| # of Effective rHuPH20 per NP | Short linker | Long linker |
|-------------------------------|--------------|-------------|
| Small NP                      | 8.10 ± 1.43  | 8.34 ± 0.98 |
| Large NP                      | 11.5 ± 2.33  | 14.4 ± 2.12 |

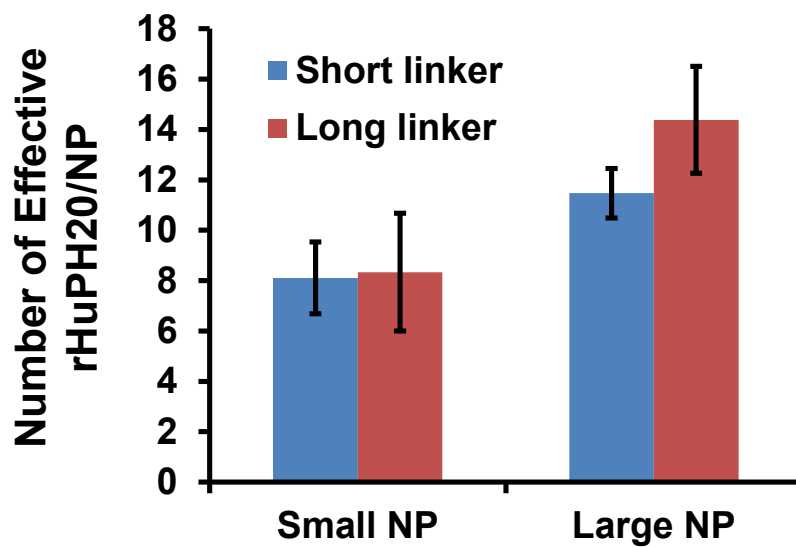

Figure S3. Number of effective rHuPH20/NP. Values indicate mean ± s.d. (n=3).

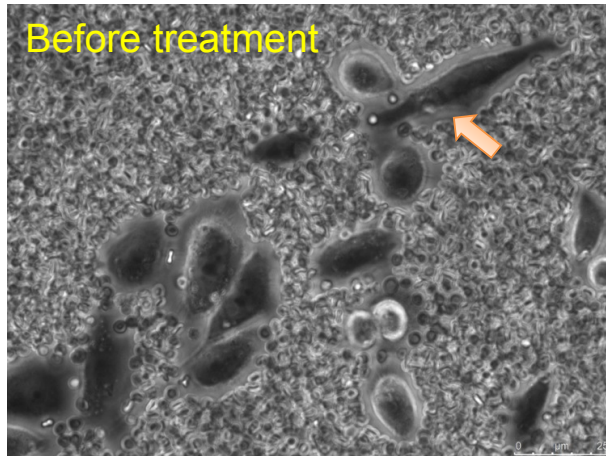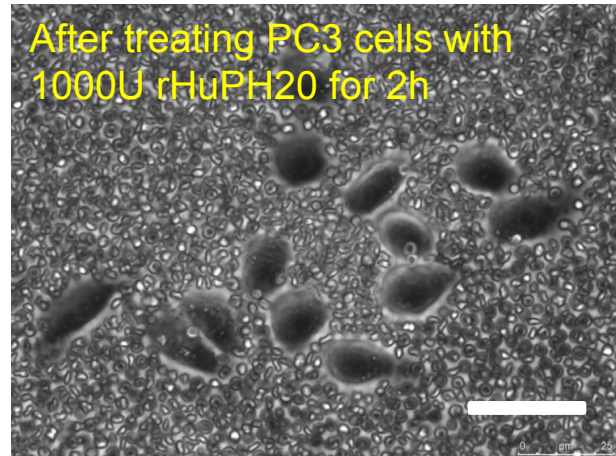

### Exclusion area per cell

| Before rHuPH20 treatment       | After rHuPH20 treatment      | Depleted Matrix area |
|--------------------------------|------------------------------|----------------------|
| $128.3 \pm 21.9 \mu\text{m}^2$ | $40.2 \pm 6.4 \mu\text{m}^2$ | $88.1 \mu\text{m}^2$ |

Figure S4. Measurement of the pericellular HA matrix around PC3 cells via a RBC exclusion assay (scale bar = 20  $\mu\text{m}$ ). PC3 cells were treated without and with 1000 U/mL of free rHuPH20 for 2 hours before adding fixed-RBCs. The arrow is pointing to the matrix. The images were analyzed through ImageJ, and the matrix area/cell was calculated. Values are mean  $\pm$  s.d. (n=10).

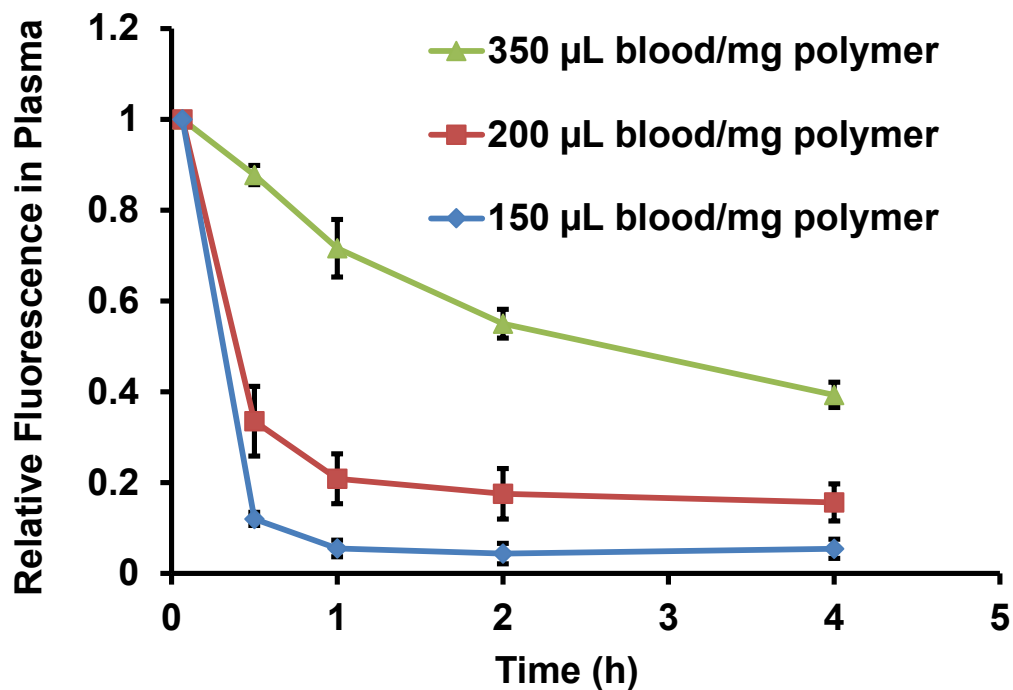

Figure S5. Effect of cell membrane/PLGA-NP surface area ratio on RBCM-NP blood circulation. For every mg of PLGA-NPs, a series amount of RBC membranes from 350, 200, 150  $\mu$ L of blood were mixed and extruded together. The resulting RBCM-NPs were administered through tail vein injection at 100  $\mu$ L of 8 mg/mL per mouse. At different time points, blood was collected and the fluorescence intensity in plasma was detected via TECAN at 600nm/655nm. Values indicate mean  $\pm$  s.d. (n = 3-4).

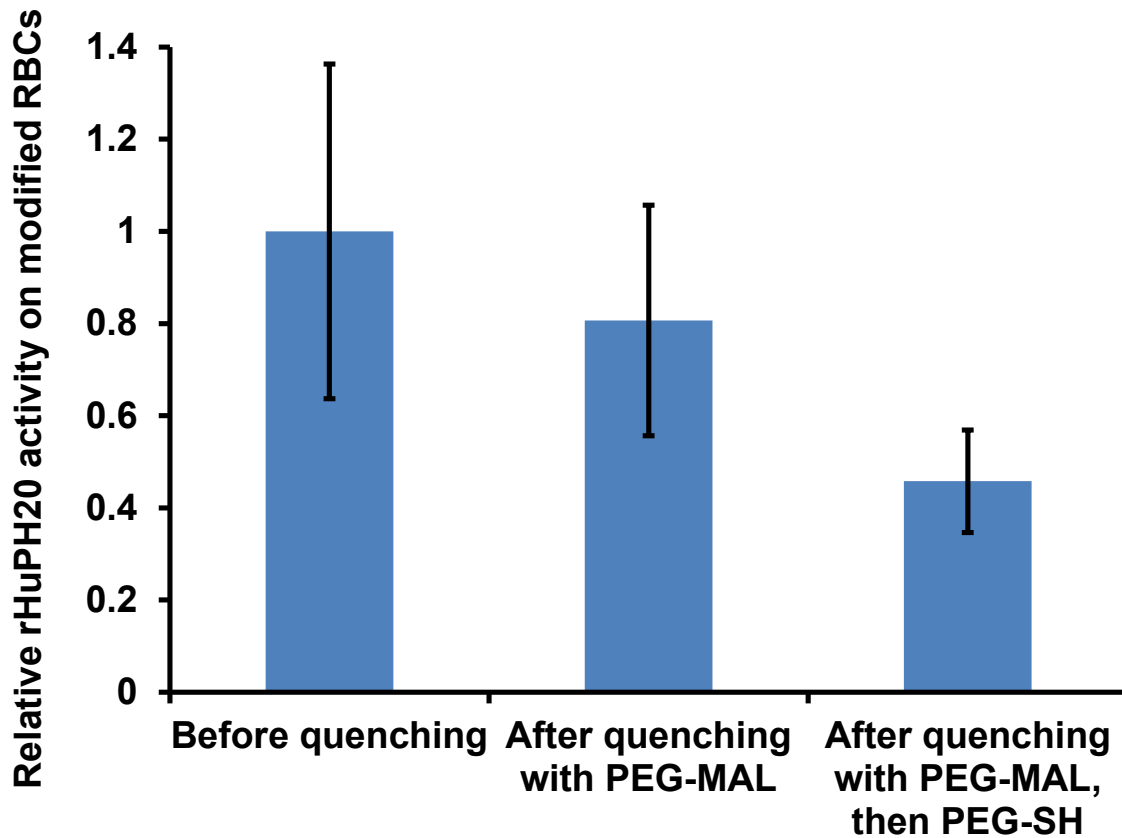

Figure S6. Relative rHuPH20 activity on modified RBCs before and after quenching unreacted thiol and maleimide groups with PEG<sub>2K</sub>-maleimide and PEG<sub>2K</sub>-thiol sequentially. Value indicates mean  $\pm$  s.d. (n = 3).
